# Supplementary material for: Impacts of ovarian preservation on the prognosis of neuroendocrine cervical carcinoma: a retrospective analysis based on machine learning
Source: Springer Nature journal article supplement (doi:10.1186/s12957-023-03014-9), 2023-05-12

**A** LASSO coefficient profiles of DFS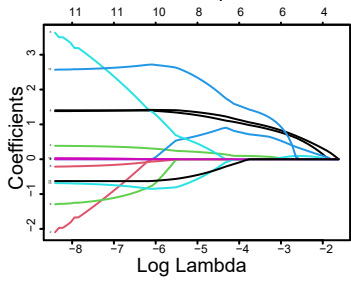**B** LASSO tuning parameter selection of DFS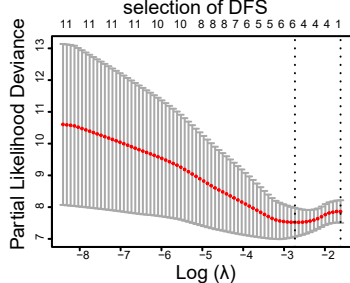**C** Optimum subsets regression DFS error by Feature Inclusion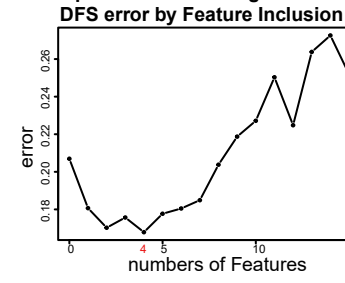**D** Variables related to DFS chosen by stepwise regression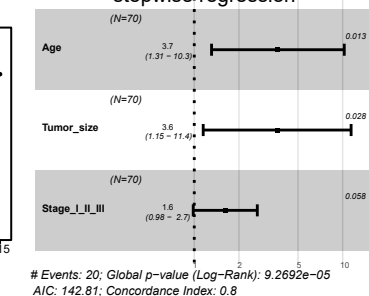**E** LASSO coefficient profiles of OS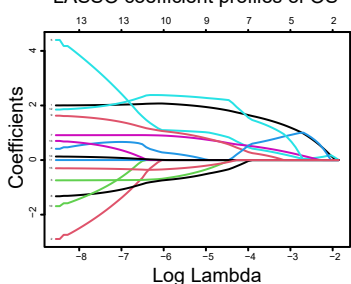**F** LASSO tuning parameter selection of OS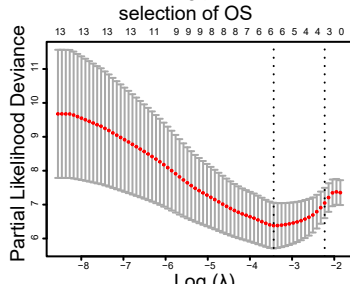**G** Optimum subsets regression OS error by Feature Inclusion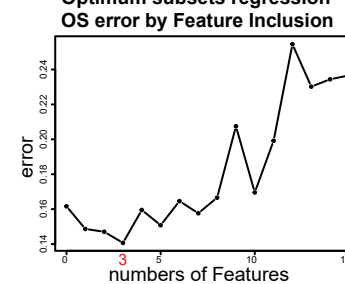**H** Variables related to OS chosen by stepwise regression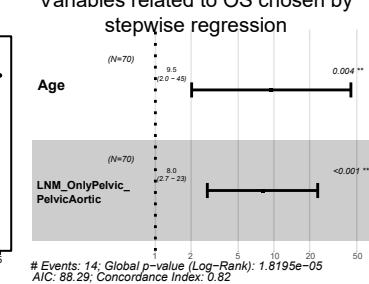**I** DFS risk group of training cohort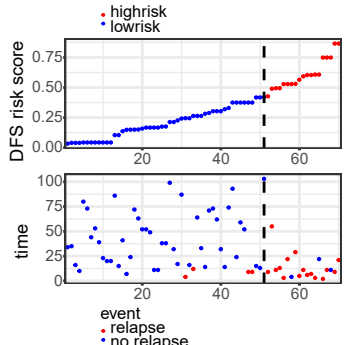**J** DFS risk group of testing cohort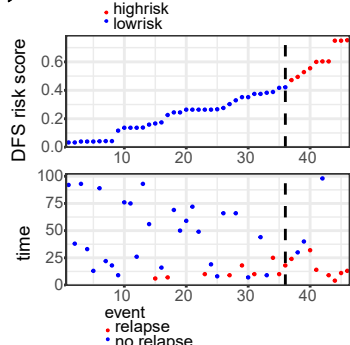**K** t-ROC for DFS in training cohort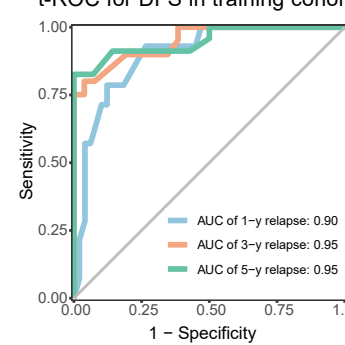**L** t-ROC for DFS in testing cohort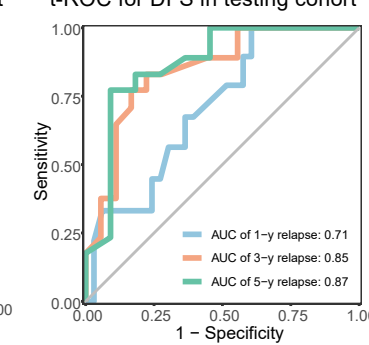**M** t-ROC for DFS in all patients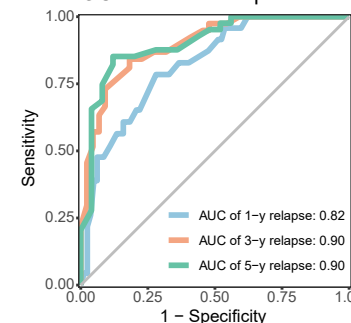**N** DFS survival in all patients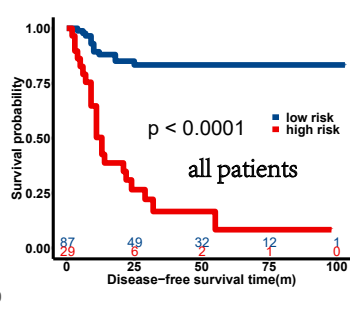**O** DFS survival in training cohort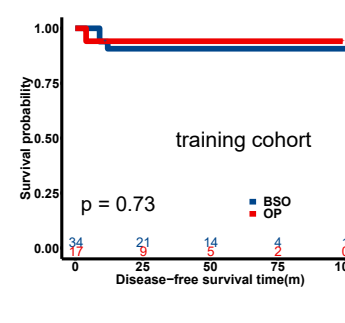**P** DFS survival in testing cohort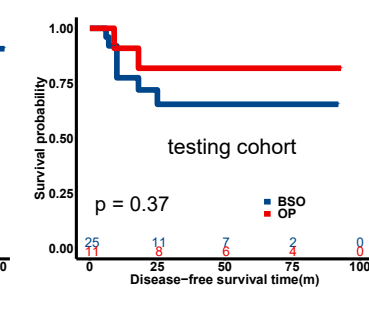**Q** OS risk group of training cohort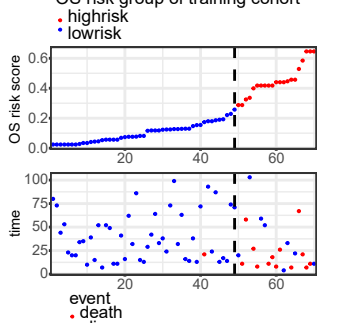**R** OS risk group of testing cohort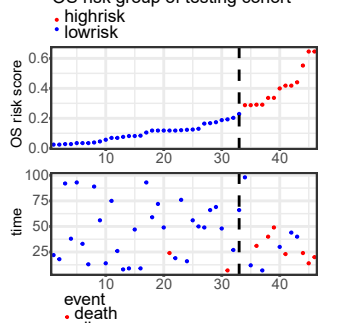**S** t-ROC for OS in training cohort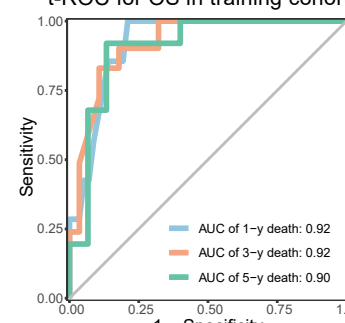**T** t-ROC for OS in testing cohort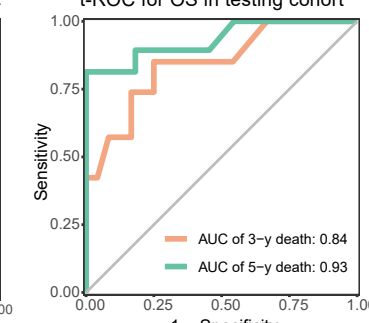**U** t-ROC for OS in all patients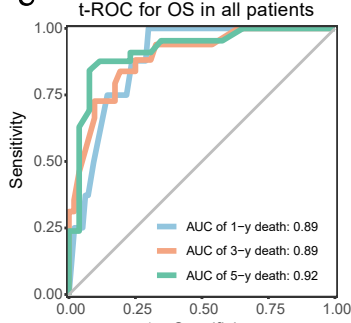**V** OS survival in all patients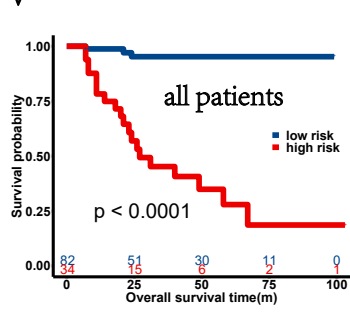**W** OS survival in training cohort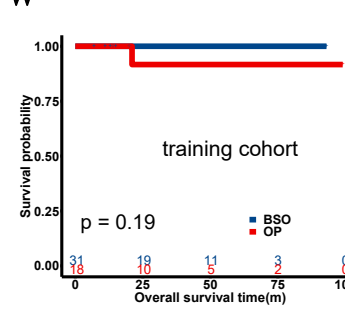**X** OS survival in testing cohort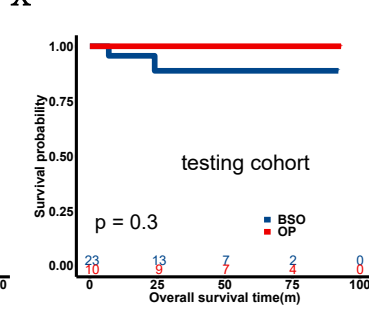

Supplement: MOESM3 [file 25352838]
