# Supplementary material for: Impacts of ovarian preservation on the prognosis of neuroendocrine cervical carcinoma: a retrospective analysis based on machine learning
Source: Springer Nature journal article supplement (doi:10.1186/s12957-023-03014-9), 2023-05-12

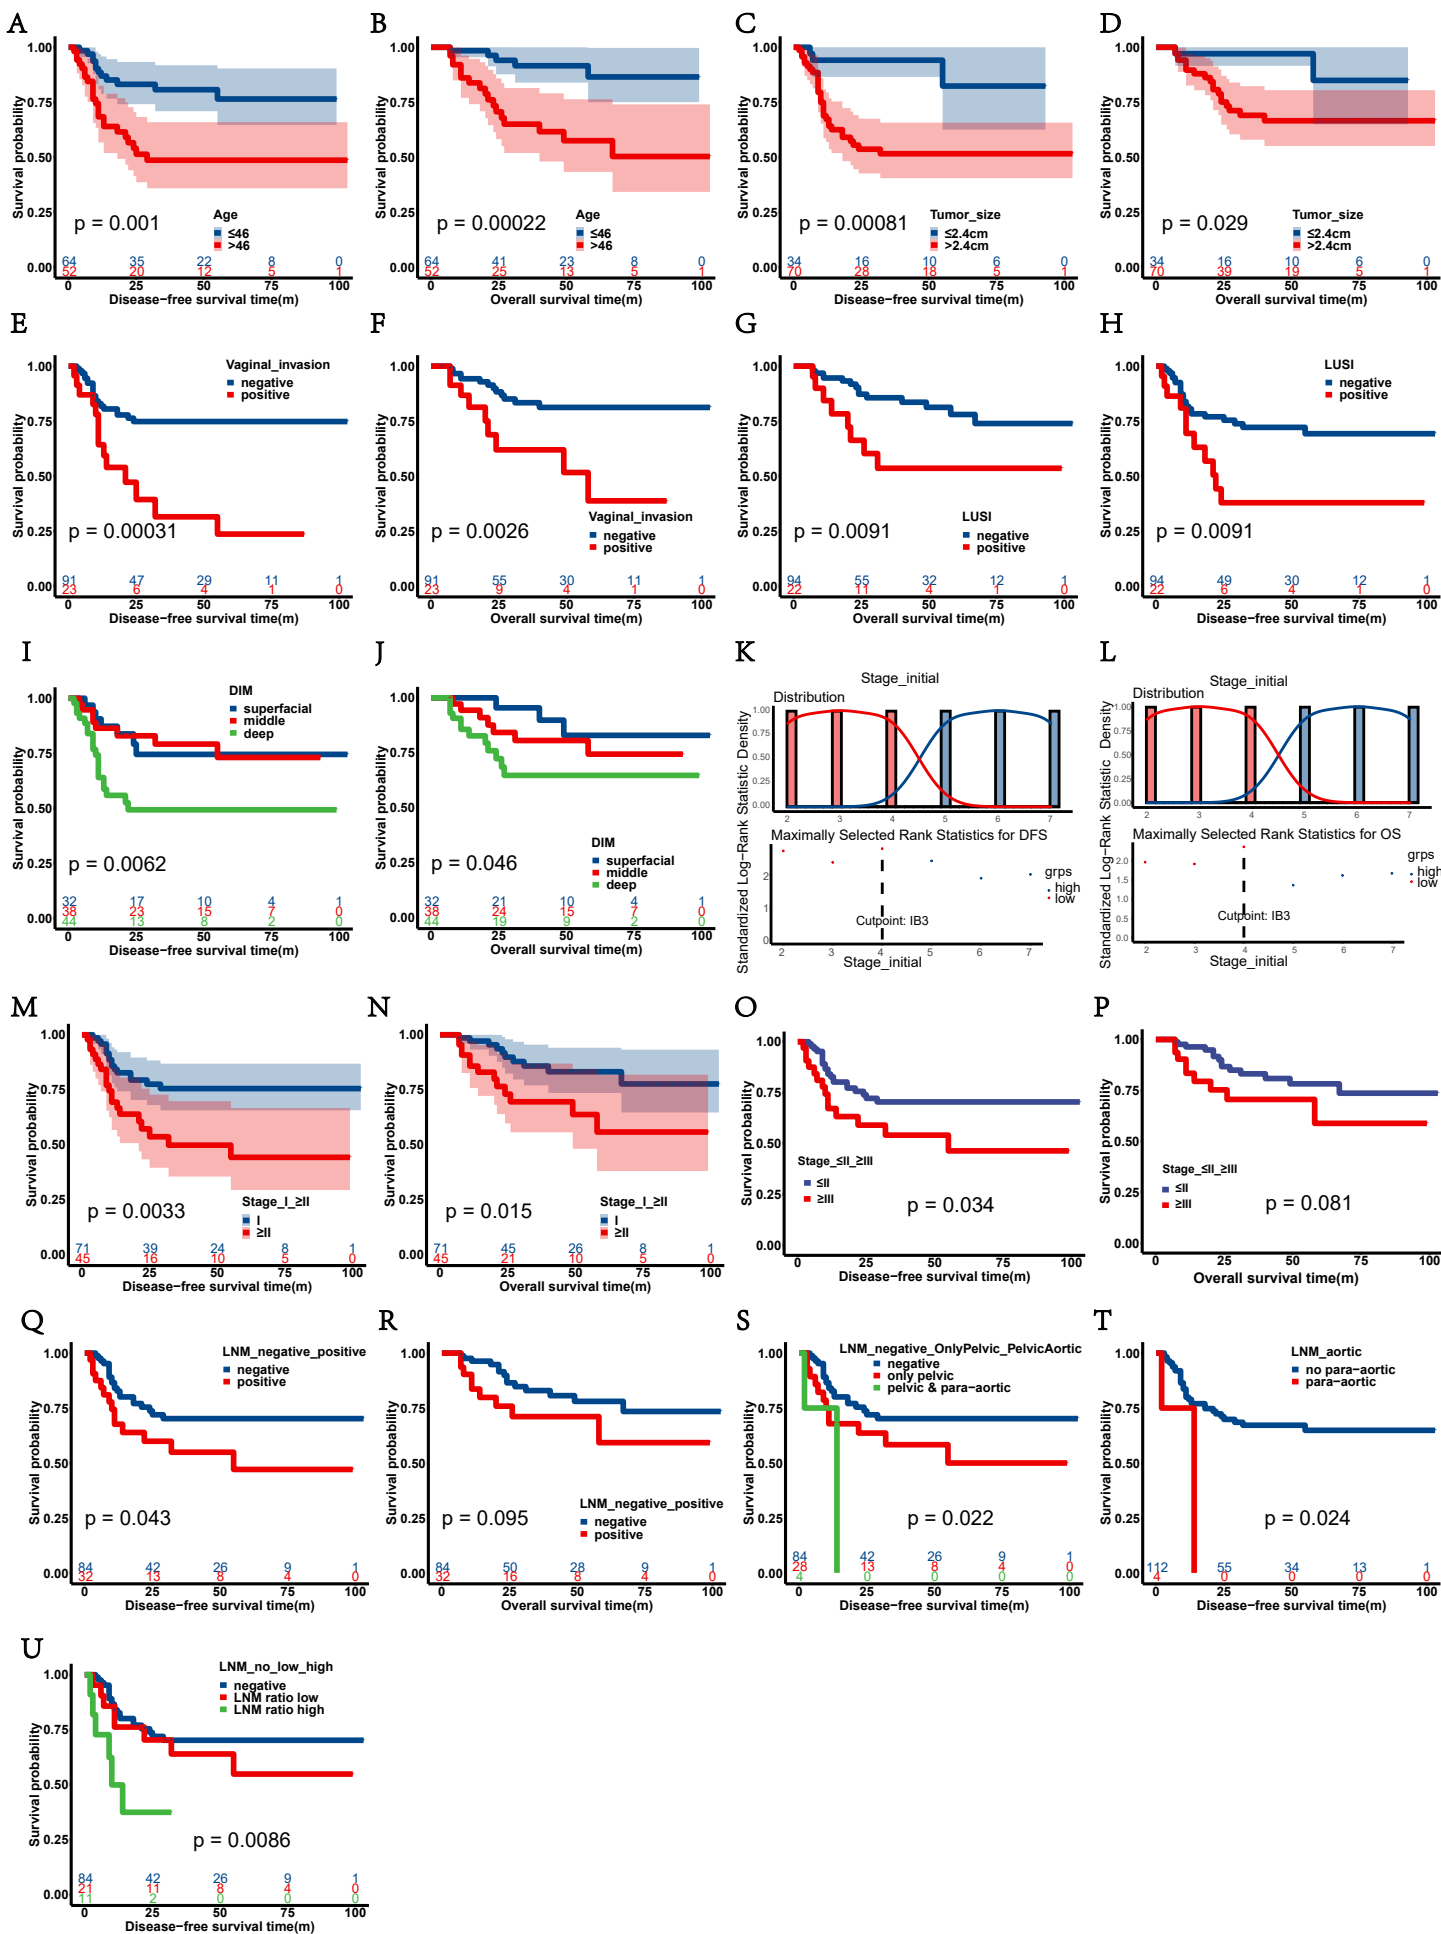

Supplement: MOESM2 [file 25352838]
